# Supplementary material for: A non-confined gamma monoclinic sulfur cathode in carbonate electrolyte based room temperature K–S batteries
Source: Royal Society of Chemistry journal article supplement (doi:10.1039/d3ta01751f), 2023-01-01
Supplement: d3ta01751f1.pdf [file d3ta01751f1.pdf]

## Non-Confined Gamma Monoclinic Sulfur Cathode in Carbonate Electrolyte Based Room Temperature K-S Batteries

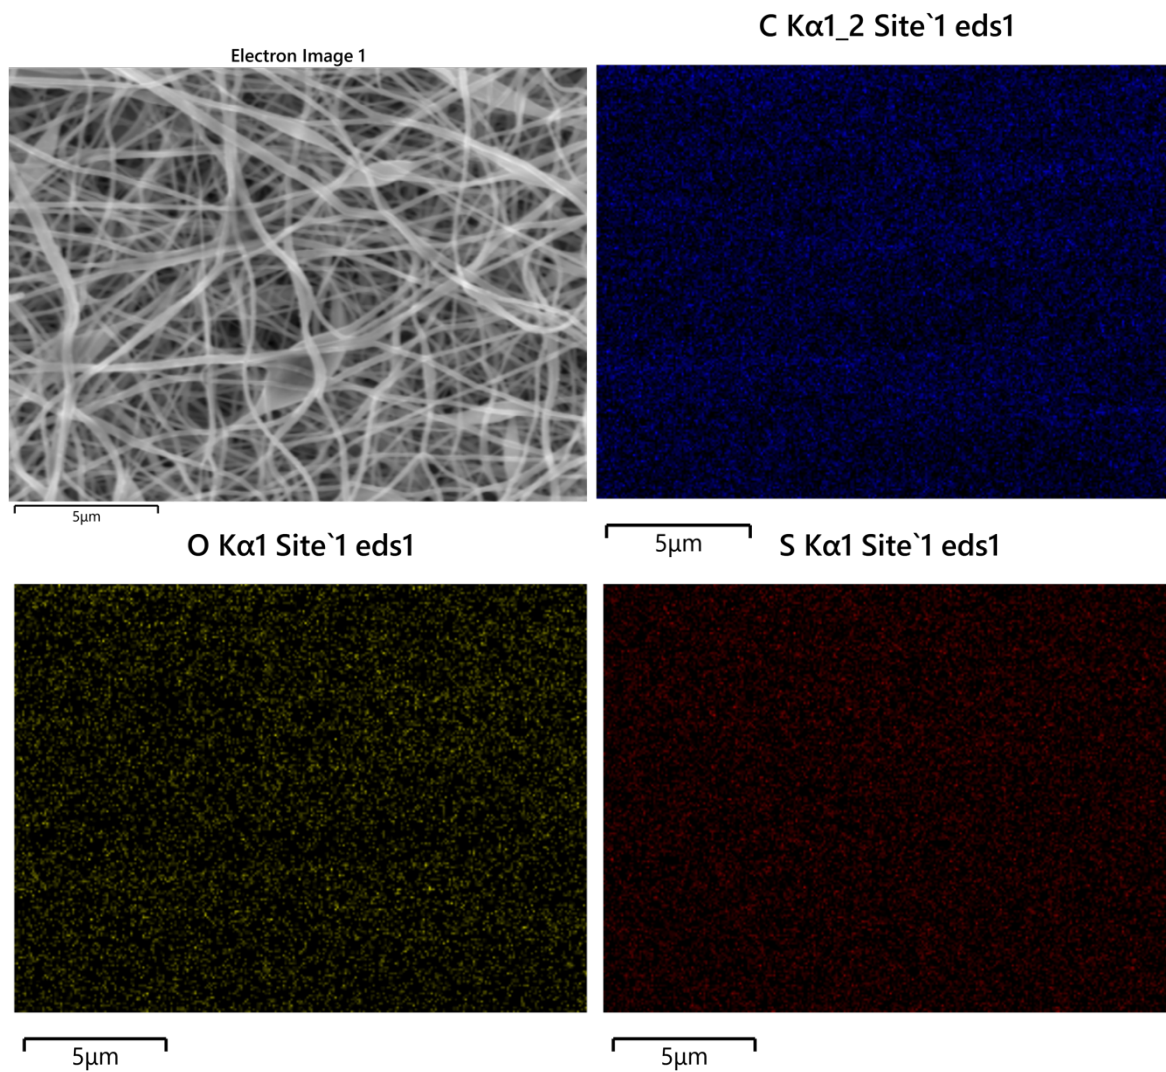

Figure S1 EDS data from  $\gamma$ -S CNF

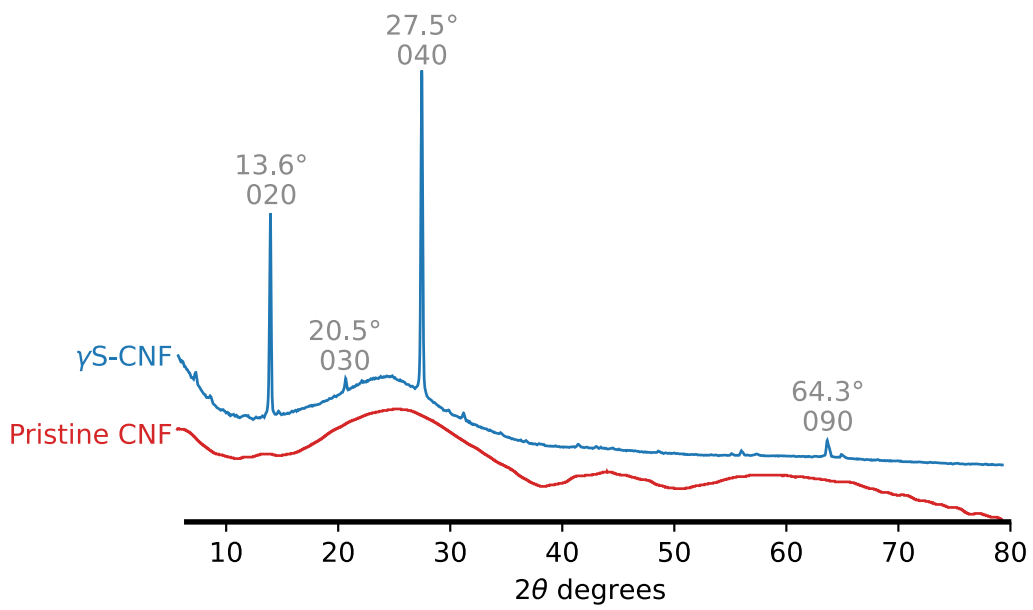

Figure S2 XRD pattern before and after  $\gamma$ S deposition

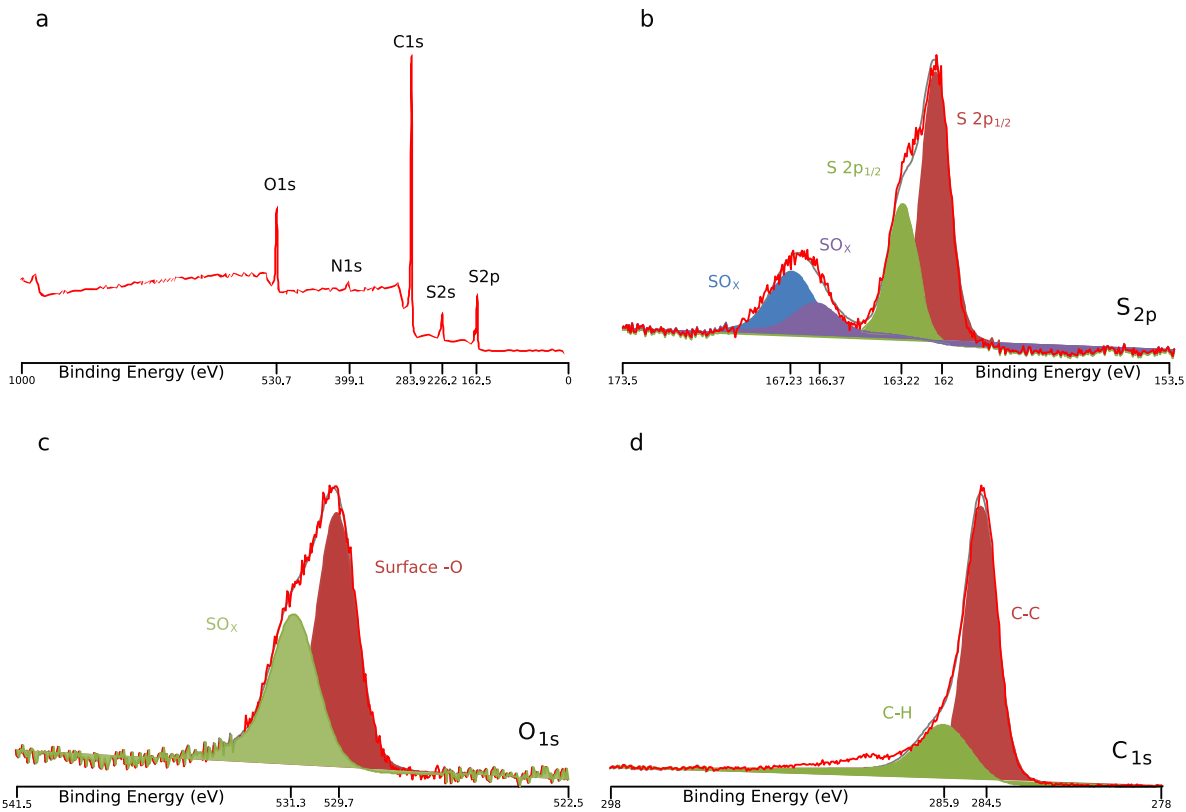

Figure S3 XPS survey

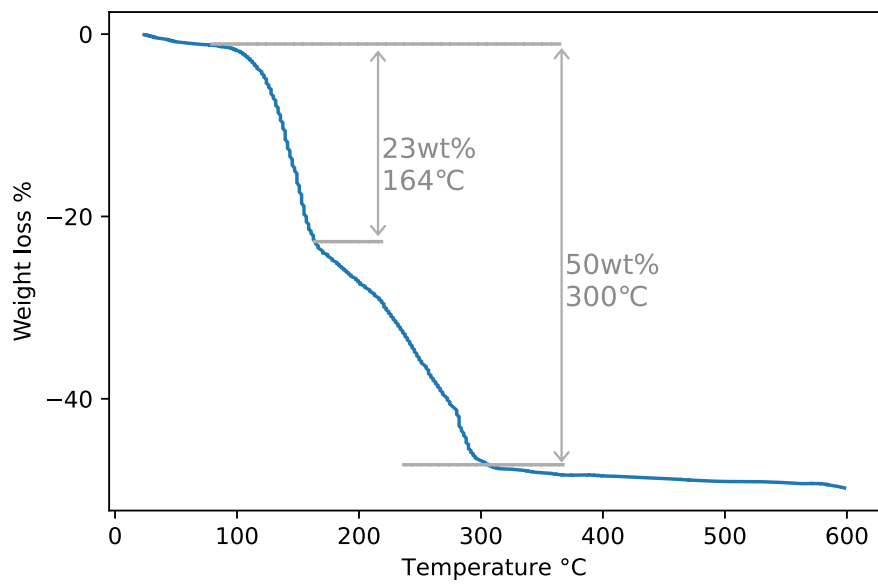

Figure S4 TGA analysis of  $\gamma$ S-CNFs in argon environment showing S loss of  $\sim$  50wt%

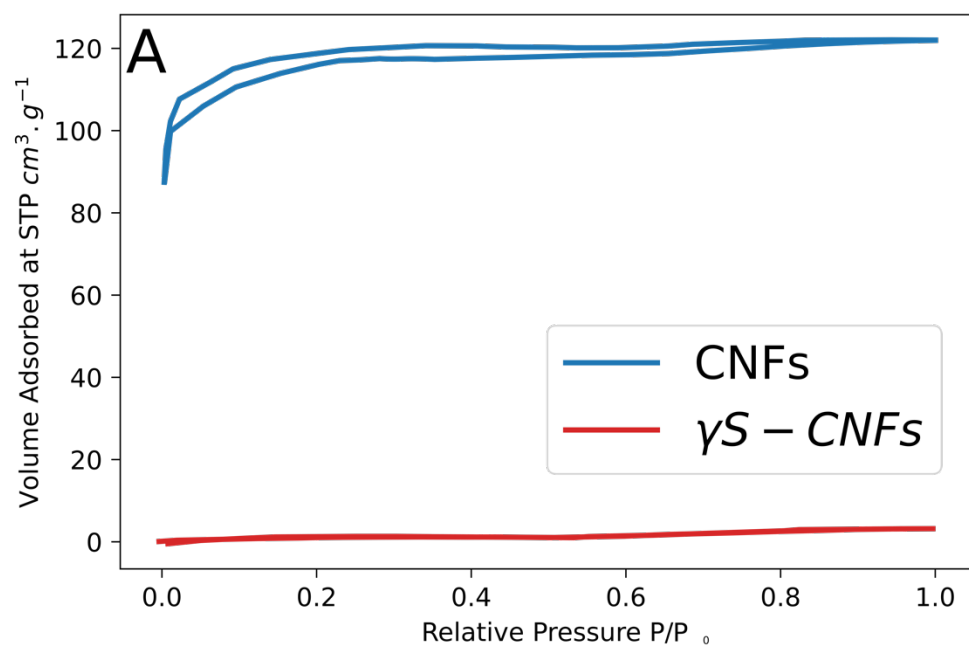

#### Pore Size Distribution

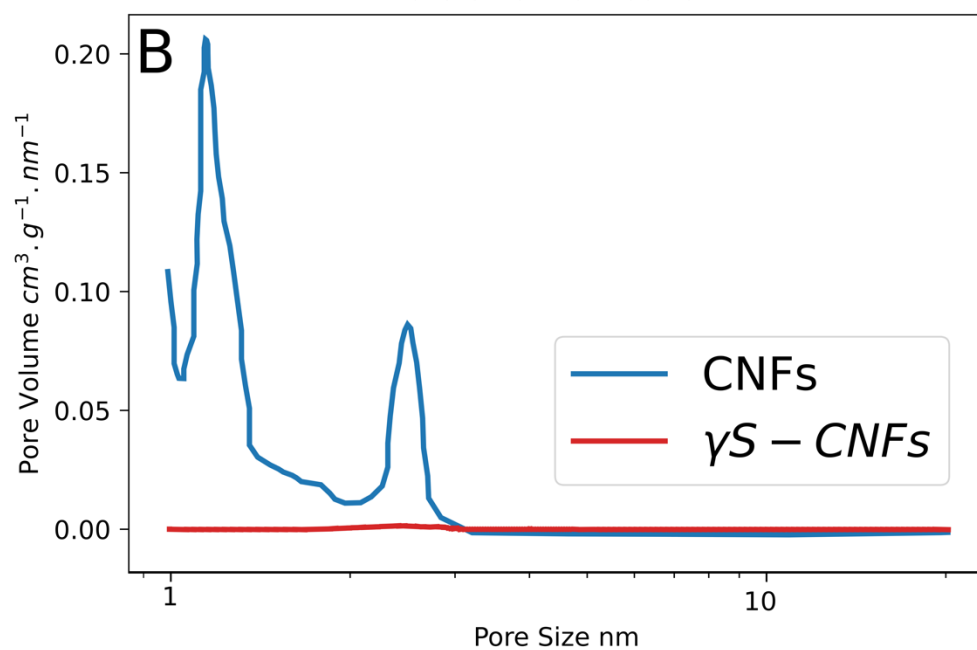

Figure S5 Porosity measurements before and after sulfur deposition on CNFs A) BET  $N_2$  adsorption/desorption isotherm plots. For CNFs exhibits a plateau at middle and high relative pressures, with a sharp increase at low relative pressures ( $P/P_0 < 0.05$ ). The hysteresis between  $0.2 < P/P_0 < 1.0$  represents mesoporosity. The isotherms is combination of IUPAC types I and IV, showing the presence of microporosity and mesoporosity. This can be seen in B) the pore size distribution which shows lack of porosity after sulfur deposition.

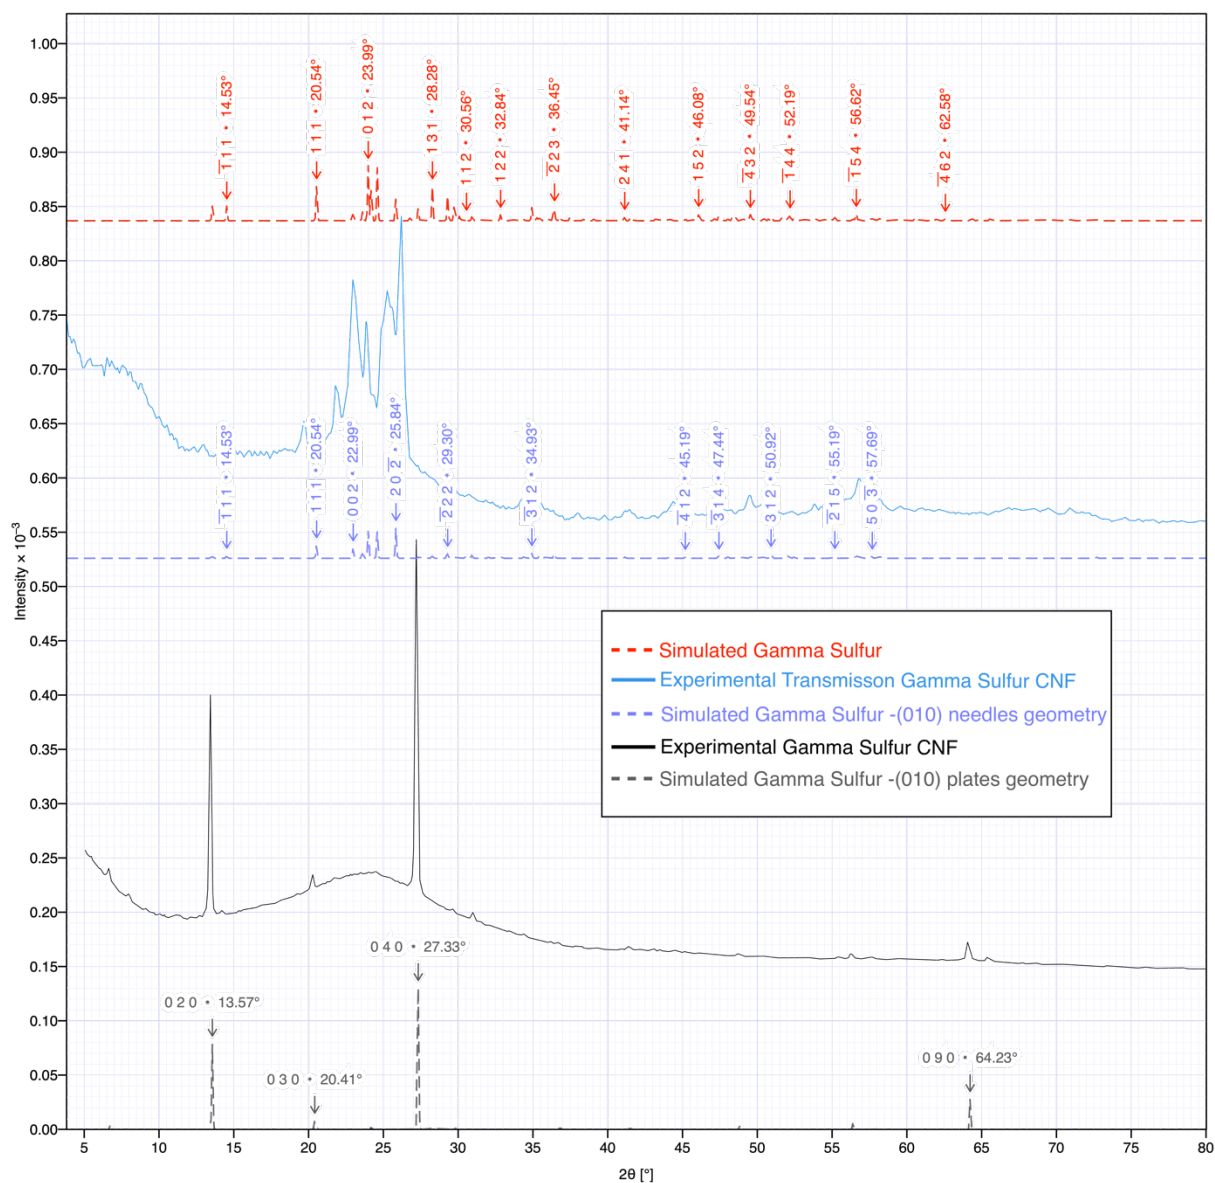

Figure S6 XRD of the various  $\gamma$ S simulations and  $\gamma$ S CNF expanded from Figure 3, intensities have been altered to fit the spectra on a single graph. Simulated  $\gamma$ S in red closely resembles the xrd of Rosickyite. This is due to the fact that Rosickyite is the rare but naturally occurring mineral form of  $\gamma$ S.<sup>1,2</sup>

## Citations

- 1 S. Douglas and H. Yang, Mineral biosignatures in evaporites: Presence of rosickyite in an endoevaporitic microbial community from Death Valley, California, *Geology*, 2002, **30**, 1075–1078.
- 2 R. J. King, >Minerals explained 27: Sulphur, *Geology Today*, 1999, **15**, 157–160.
